# Supplementary material
Source: Springer Nature journal article supplement (https://www.springermedizin.de/resource/supplementary/12874_2011_822_MOESM4_ESM.pdf/9432696)

Mean scores of CRIS subscales by group

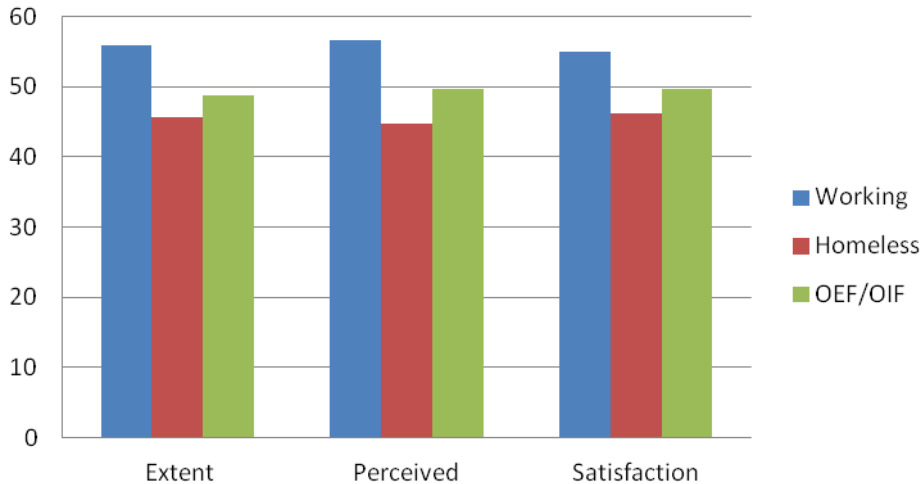

Supplement: MOESM4 [file 9432696]
